# Supplementary material
Source: PubMed Central journal article supplement (PMC1880846)

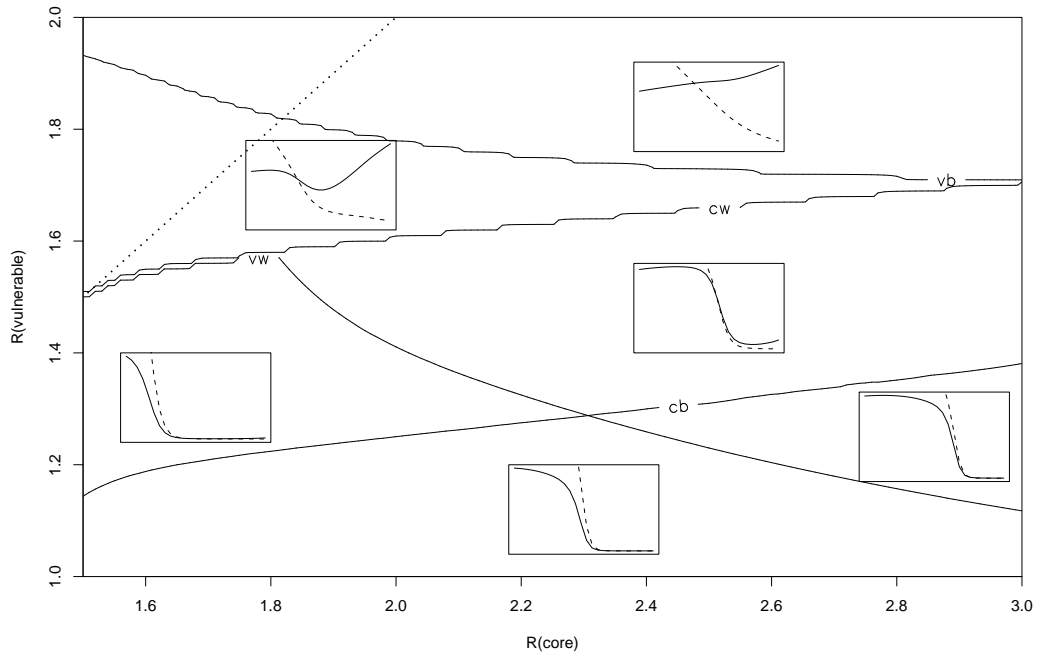

Supplement: pmed.0040174.sg001.pdf [file pmed.0040174.sg001.pdf]
